# Supplementary material for: Family Physicians Working at Hospitals: A 20-Year Nationwide Trend Analysis in Taiwan
Source: MDPI journal article supplement (doi:10.3390/ijerph18179097), 2021-08-28
Supplement: s1 [file s1]

## Supplementary materials

**Table S1.** Changes in number and ratio of physicians registered as family physicians (FPs) in TMA and members enrolled in TAFM in Taiwan from 1999 to 2018.

|      | Registered<br>FPs in TMA | Changes of FP<br>in TMA/Year | Official members<br>of TAFM | Changes of FP<br>in TAFM/Year | Ratio of FPs in<br>TMA to TAFM |
|------|--------------------------|------------------------------|-----------------------------|-------------------------------|--------------------------------|
| 1999 | 1876                     |                              | 3903                        |                               | 48.1%                          |
| 2000 | 1976                     | 100                          | 3947                        | 44                            | 50.1%                          |
| 2001 | 2098                     | 122                          | 3996                        | 49                            | 52.5%                          |
| 2002 | 2214                     | 116                          | 4062                        | 66                            | 54.5%                          |
| 2003 | 2343                     | 129                          | 4102                        | 40                            | 57.1%                          |
| 2004 | 2514                     | 171                          | 4159                        | 57                            | 60.4%                          |
| 2005 | 2666                     | 152                          | 4228                        | 69                            | 63.1%                          |
| 2006 | 2792                     | 126                          | 4282                        | 54                            | 65.2%                          |
| 2007 | 2874                     | 82                           | 4371                        | 89                            | 65.8%                          |
| 2008 | 2967                     | 93                           | 4459                        | 88                            | 66.5%                          |
| 2009 | 3061                     | 94                           | 4565                        | 106                           | 67.1%                          |
| 2010 | 3134                     | 73                           | 4676                        | 111                           | 67.0%                          |
| 2011 | 3182                     | 48                           | 4786                        | 110                           | 66.5%                          |
| 2012 | 3172                     | -10                          | 4882                        | 96                            | 65.0%                          |
| 2013 | 3270                     | 98                           | 4967                        | 85                            | 65.8%                          |
| 2014 | 3336                     | 66                           | 5079                        | 112                           | 65.7%                          |
| 2015 | 3447                     | 111                          | 5177                        | 98                            | 66.6%                          |
| 2016 | 3540                     | 93                           | 5256                        | 79                            | 67.4%                          |
| 2017 | 3581                     | 41                           | 5328                        | 72                            | 67.2%                          |
| 2018 | 3655                     | 74                           | 5256                        | -72                           | 69.5%                          |

**Table S2.** Ratio of family physicians to physicians registered in other specialties in TMA in Taiwan from 1999 to 2018.

|      | Family<br>Medicine | Internal<br>Medicine | Surgery | Pediatrics | Gynecology | Others | General<br>Practice | Total<br>Physicians | Ratio of FPs to other<br>specialties |
|------|--------------------|----------------------|---------|------------|------------|--------|---------------------|---------------------|--------------------------------------|
| 1999 | 1876               | 6497                 | 3079    | 2256       | 2165       | 8371   | 3715                | 27,959              | 6.7%                                 |
| 2000 | 1976               | 6726                 | 3120    | 2414       | 2207       | 9095   | 3596                | 29,134              | 6.8%                                 |
| 2001 | 2098               | 6930                 | 3154    | 2550       | 2204       | 9797   | 3499                | 30,232              | 6.9%                                 |
| 2002 | 2214               | 7024                 | 3198    | 2620       | 2184       | 10,362 | 3592                | 31,194              | 7.1%                                 |
| 2003 | 2343               | 7148                 | 3208    | 2666       | 2179       | 10,927 | 3561                | 32,032              | 7.3%                                 |
| 2004 | 2514               | 7300                 | 3225    | 2725       | 2172       | 11,513 | 3587                | 33,036              | 7.6%                                 |
| 2005 | 2666               | 7504                 | 3219    | 2760       | 2140       | 12,070 | 3628                | 33,987              | 7.8%                                 |
| 2006 | 2792               | 7768                 | 3258    | 2780       | 2149       | 12,611 | 3642                | 35,000              | 8.0%                                 |
| 2007 | 2874               | 7980                 | 3340    | 2817       | 2168       | 13,220 | 3593                | 35,992              | 8.0%                                 |
| 2008 | 2967               | 8289                 | 3397    | 2895       | 2184       | 13,836 | 3583                | 37,151              | 8.0%                                 |
| 2009 | 3061               | 8392                 | 3433    | 2978       | 2180       | 14,408 | 3518                | 37,970              | 8.1%                                 |
| 2010 | 3134               | 8545                 | 3489    | 3004       | 2179       | 15,014 | 3635                | 39,000              | 8.0%                                 |
| 2011 | 3182               | 8676                 | 3565    | 3062       | 2174       | 15,289 | 4235                | 40,183              | 7.9%                                 |
| 2012 | 3172               | 8658                 | 3463    | 3090       | 2189       | 15,574 | 5040                | 41,186              | 7.7%                                 |
| 2013 | 3270               | 8796                 | 3489    | 3171       | 2216       | 16,111 | 5153                | 42,206              | 7.7%                                 |
| 2014 | 3336               | 8933                 | 3537    | 3273       | 2237       | 16,592 | 5303                | 43,211              | 7.7%                                 |
| 2015 | 3447               | 9090                 | 3582    | 3358       | 2262       | 17,104 | 5349                | 44,192              | 7.8%                                 |
| 2016 | 3540               | 9283                 | 3631    | 3455       | 2322       | 17,701 | 5281                | 45,213              | 7.8%                                 |
| 2017 | 3581               | 9409                 | 3679    | 3537       | 2373       | 18,283 | 5590                | 46,452              | 7.7%                                 |
| 2018 | 3655               | 9721                 | 3830    | 3619       | 2412       | 18,888 | 5529                | 47,654              | 7.7%                                 |
